# Supplementary material for: Antimicrobial Activities of Different Fractions from Mucus of the Garden Snail Cornu aspersum
Source: PubMed Central journal article supplement (PMC7554965; doi:10.3390/biomedicines8090315), 2020-08-28
Supplement: biomedicines-08-00315-s001.pdf [file biomedicines-08-00315-s001.pdf]

## Supplementary Information No1

### Peptide No1 DLTLNGLSPK

**hemocyanin beta [*H. aspersa* (*C. aspersum*)]**, Sequence ID: AYO86685.1, Length: 3433, Number of Matches: 2, Score 33.3 bits(71), Identities 10/10(100%), Positives 10/10(100%), Expect 2.6, Gaps 0/10(0%)

```
Query 1 DLTLNGLSPK 10
        DLTLNGLSPK
Sbjct 303 DLTLNGLSPK 312
```

**hemocyanin beta-subunit [*Helix lucorum*]** Sequence ID: AEO51766.1, Length: 3433, Number of Matches: 1, Score 33.3 bits(71), Identities 10/10(100%), Positives 10/10(100%), Expect 2.6, Gaps 0/10(0%)

```
Query 1 DLTLNGLSPK 10
        DLTLNGLSPK
Sbjct 303 DLTLNGLSPK 312
```

**hemocyanin beta [*Helix pomatia*]** Sequence ID: AYO86688.1, Length: 3431, Number of Matches: 1, Score 33.3 bits(71), Identities 10/10(100%), Positives 10/10(100%), Expect 2.6, Gaps 0/10(0%)

```
Query 1 DLTLNGLSPK 10
        DLTLNGLSPK
Sbjct 303 DLTLNGLSPK 312
```

**RecName: Full=Hemocyanin 2; AltName: Full=Keyhole limpet hemocyanin B; Short=KLH-B; Flags:**

**Precursor [*Megathura crenulata*]** Sequence ID: Q10584.2, Length: 3421, Number of Matches: 2, Score 24.8 bits(51), Identities 7/9(78%), Positives 8/9(88%), Expect 4.7, Gaps 0/9(0%)

```
Query 1 DLTLNGLSP 9
        DL LNG+SP
Sbjct 300 DLSLNGMSP 308
```

### Peptide No2 MPDGALLGGGGD

**APD\_453|AP01405|Leptoglycin, from *Leptodactylus pentadactylus* [Smokey jungle frog], Antibacterial activity against Gram- bacteria: *P. aeruginosa*, *E. coli*, and *C. freundii***, Length=22, Score = 19.8 bits (37), Expect = 1.2, Identities = 7/8(88%), Positives = 7/8(88%), Gaps = 0/8(0%)

```
Query 4 GALLGGGG 11
        G LLGGGG
Sbjct 8 GPLLGGGG 15
```

### Peptide No3 DGPADNAQGAVG

**Chain A, Polyphenol oxidase, chloroplastic [*Malus domestica*]** Sequence ID: 6ELS\_A, Length: 506, Number of Matches: 1, Score 22.7 bits(46), Identities 8/10(80%), Positives 8/10(80%), Expect 7.0, Gaps 0/10(0%)

```
Query 2 GPADNAQGAV 11
        GPAD QGAV
Sbjct 14 GPADLPQGAV 23
```

**CAMPSQ1419|Linocin\_M18 bacteriocin protein, UniProt: A4JQR6, *Burkholderia vietnamiensis* G4**

Length=255, Score = 18.6 bits(36), Expect = 8.4, Identities = 7/12(58%), Positives = 8/12(67%), Gaps = 0/12(0%)

```
Query 1 DGPADNAQGAV 12
        +GPA A AVG
Sbjct 40 EGPAGPALSAVG 51
```

### Peptide No4 SLEERDIQS

**hemocyanin beta [*Helix aspersa* (*Cornu aspersum*)]**, Sequence ID: AYO86685.1, Length: 3433, Number of Matches: 1, Score 31.6 bits(67), Identities 9/9(100%), Positives 9/9(100%), Expect 8.6, Gaps 0/9(0%)

```
Query 1 SLEERDIQS 9
        SLEERDIQS
Sbjct 2126 SLEERDIQS 2134
```

**hemocyanin beta-subunit [*Helix lucorum*]**, Sequence ID: AEO51766.1, Length: 3433, Number of Matches: 1, Score 31.6 bits(67), Identities 9/9(100%), Positives 9/9(100%), Expect 8.6, Gaps 0/9(0%)

```
Query 1 SLEERDIQS 9
        SLEERDIQS
Sbjct 2126 SLEERDIQS 2134
```

**hemocyanin beta [*Helix pomatia*]**, Sequence ID: AYO86688.1, Length: 3431, Number of Matches: 1, Score 31.6 bits(67), Identities 9/9(100%), Positives 9/9(100%), Expect 8.6, Gaps 0/9(0%)

```
Query 1 SLEERDIQS 9
      SLEERDIQS
Sbjct 2124 SLEERDIQS 2132
```

**hemocyanin alphaD [*Helix aspersa (Cornu aspersum)*]**, Sequence ID: AYO86683.1, Length: 3426, Number of Matches: 2, Score 31.6 bits(67), Identities 9/9(100%), Positives 9/9(100%), Expect 8.6, Gaps 0/9(0%)

```
Query 1 SLEERDIQS 9
      SLEERDIQS
Sbjct 2121 SLEERDIQS 2129
```

**CAMPSQ5524|Maximins 31/H15, UniProt: C3RTJ3, from *Bombina microdeladigitora* [Hubei firebelly toad],**

**Antimicrobial activity**, Length=142, Score = 19.3 bits (36), Expect = 4.2, Identities = 6/7 (86%), Positives = 7/7 (100%), Gaps = 0/7(0%)

```
Query 3 EERDIQS 9
      EE+DIQS
Sbjct 21 EEKDIQS 27
```

### **Peptide No5 GLLAAGAGGGGA**

**transcription factor SOX-1 [*Mesocricetus auratus*]**, Sequence ID: XP\_005073405.2, Length: 458, Number of Matches: 1, Score 42.6 bits (93), Identities 15/15(100%), Positives 15/15(100%), Expect 0.003, Gaps 0/15(0%)

```
Query 1 GLLAAGAGGGGA 15
      GLLAAGAGGGGA
Sbjct 206 GLLAAGAGGGGA 220
```

**APD\_453|AP01405|Leptoglycin, from *Leptodactylus pentadactylus* [Smokey jungle frog], Antibacterial activity against Gram- bacteria: *P. aeruginosa*, *E. coli*, and *C. freundii***, Length=22, Score = 21.5 bits(41), Expect = 0.036, Identities = 8/12(67%), Positives = 8/12(67%), Gaps = 0/12(0%)

```
Query 1 GLLAAGAGGGG 12
      G LL G GGGG
Sbjct 8 GPLLGGGGGGG 19
```

### **Peptide No6 LGLNGGAGGGLVGG**

**CAMPSQ3913|Ctenidin-1, UniProt: P86798, from *Cupiennius salei* [Wandering spider] Antimicrobial activity**, Length=119, Score = 28.0 bits(56), Expect = 0.008, Identities = 11/15(73%), Positives = 12/15(80%), Gaps = 0/15(0%)

```
Query 1 LGLNGGAGGGLVGG 15
      +GLG GG GGGL GG
Sbjct 61 VGLGGGYGGGLGG 75
```

Score = 23.7 bits (46), Expect = 0.023, Identities = 11/15(73%), Positives = 11/15(73%), Gaps = 1/15(7%)

```
Query 2 GLGNG-GAGGGLVGG 15
      GLG G G GGGL GG
Sbjct 71 GLGGGQGGGGLGG 85
```

**CAMPSQ3914 |Ctenidin-3, UniProt: P86797, from *Cupiennius salei* [Wandering spider], Antimicrobial activity**, Length=120, Score = 28.0 bits(56), Expect = 0.008, Identities = 11/15(73%), Positives = 12/15(80%), Gaps = 0/15(0%)

```
Query 1 LGLNGGAGGGLVGG 15
      +GLG GG GGGL GG
Sbjct 63 VGLGGGYGGGLGG 77
```

Score = 23.7 bits(46), Expect = 0.023, Identities = 11/15(73%), Positives = 11/15(73%), Gaps = 1/15(7%)

```
Query 2 GLGNG-GAGGGLVGG 15
      GLG G G GGGL GG
Sbjct 73 GLGGGQGGGGLGG 87
```

**DBAASP\_2872|3112|Acanthoscurrin-1, Strong activity against the Gram- bacterium *E. coli* and yeast *C.albicans***, Length=132, Score = 26.2 bits(52), Expect = 0.033, Identities = 10/14(71%), Positives = 11/14(79%), Gaps = 0/14(0%)

```
Query 2 GLGNGGAGGGLVGG 15
      GLG GG GGG +GG
Sbjct 25 GLGGGGLGGGGLGG 38
```

Score = 26.2 bits(52), Expect = 0.033, Identities = 10/14(71%), Positives = 11/14(79%), Gaps = 0/14(0%)

```
Query 2 GLGNGGAGGGLVGG 15
      GLG GG GGG +GG
Sbjct 41 GLGGGGLGGGGLGG 54
```

**DBAASP\_2873|3113|Acanthoscurrin-2, Strong activity against the Gram<sup>-</sup> bacterium *E.coli* and yeast *C.albicans*,**  
Length=130, Score = 26.2 bits(52), Expect = 0.033, Identities = 10/14(71%), Positives = 11/14(79%), Gaps = 0/14(0%)

```
Query 2   GLGNGGAGGGLVGG 15
          GLG GG GGG +GG
Sbjct 25   GLGGGGLGGGGLGG 38
```

Score = 26.2 bits(52), Expect = 0.033, Identities = 10/14(71%), Positives = 11/14(79%), Gaps = 0/14(0%)

```
Query 2   GLGNGGAGGGLVGG 15
          GLG GG GGG +GG
Sbjct 41   GLGGGGLGGGGLGG 54
```

### **Peptide No7 LNLGLDAGGGDPGG**

**RecName: Full=Probable UDP-sugar transporter protein SLC35A4; AltName: Full=Solute carrier family 35 member A4 [Bos taurus],** Sequence ID: Q05B73.1, Length: 324, Number of Matches: 1, Score 28.2 bits(59), Identities 11/13(85%), Positives 11/13(84%), Expect 0.62, Gaps1/13(7%)

```
Query 1   LNLGLDAGGGDPG 13
          LNLGL AGGG PG
Sbjct 231  LNLGLHAGGG-PG 242
```

**APD\_1670|AP00404|Holotricin 3, UniProt: Q25055, Antibacterial and Antifungal activity,** Length = 84, Score = 21.1 bits(40), Expect = 1.3, Identities = 8/11(73%), Positives = 8/11(73%), Gaps = 0/11(0%)

```
Query 4   GLDAGGGDPGG 14
          G AGGG PGG
Sbjct 60   GHGAGGGYPGG 70
```

**AMSDb\_332|CRN\_LITVA|CRUSTIN, 11 kDa ATIMICROBIAL PROTEIN, CRUSTACEAN DEFENSE PROTEIN,**  
Length=163, Score = 20.6 bits(39), Expect = 2.2, Identities = 7/11(64%), Positives = 8/11 (73%), Gaps = 0/11(0%)

```
Query 4   GLDAGGGDPGG 14
          G+ GGG PGG
Sbjct 37   GVGVGGGFPGG 47
```

### **Peptide No8 FNHKSLPKLEN**

**Chain C, Neutral trehalase [*Saccharomyces cerevisiae* S288C]** Sequence ID: 5N6N\_C, Length: 756, Number of Matches: 1, Score 21.8 bits(44), Identities 6/7(86%), Positives 6/7(85%), Expect 0.19, Gaps 0/7(0%).

```
Query 4   KSLPKLE 10
          K LPKLE
Sbjct 598  KALPKLE 604
```

**hypothetical protein CHL9767\_09410 [*Campylobacter hyointestinalis* subsp. lawsonii],** Sequence ID: RAZ61964.1, Length: 59, Number of Matches: 1, Score 27.4 bits(57), Identities 9/10(90%), Positives 9/10(90%), Expect 0.21, Gaps 1/10(10%)

```
Query 3   HKSLPK-LEN 11
          HKSLPK LEN
Sbjct 39   HKSLPKWLEN 48
```

**hemocyanin beta [*Helix aspersa (Cornu aspersum)*],** Sequence ID: AYO86685.1, Length: 3433, Number of Matches: 1, Score 26.9 bits(56), Identities 8/11(73%), Positives 8/11(72%), Expect 0.28, Gaps 0/11(0%)

```
Query 1   FNHKSLPKLEN 11
          FNH S P LEN
Sbjct 1561  FNHQSIQLEN 1571
```

**hemocyanin beta-subunit [*Helix lucorum*],** Sequence ID: AEO51766.1, Length: 3433, Number of Matches: 1, Score 26.9 bits(56), Identities 8/11(73%), Positives 8/11(72%), Expect 0.28, Gaps 0/11(0%)

```
Query 1   FNHKSLPKLEN 11
          FNH S P LEN
Sbjct 1561  FNHQSIQLEN 1571
```

**hemocyanin beta [*Helix pomatia*]** Sequence ID: AYO86688.1, Length: 3431, Number of Matches: 1, Score 26.9 bits(56), Identities 8/11(73%), Positives 8/11(72%), Expect 0.28, Gaps 0/11(0%)

```
Query 1   FNHKSLPKLEN 11
          FNH S P LEN
Sbjct 1561  FNHQSIQLEN 1571
```

### **Peptide No9 NLVGGLSGGGRGGAPGG**

**DBAASP\_2873|3113|Acanthoscurrin-2, UniProt: Q8I6R7, Antibacterial (Gram<sup>-</sup>) and Antifungal activity, Length=130,**

Score = 26.2 bits (52), Expect = 0.026 Identities = 10/14 (71%), Positives = 10/14(71%), Gaps = 0/14(0%)

```
Query 4 GGLSGGGRGGAPGG 17
      GGL GGG GG GG
Sbjct 97 GGLGGGGLGGGRGG 110
```

Score = 24.5 bits (48), Expect = 0.13, Identities = 11/14(79%), Positives = 11/14(79%), Gaps = 1/14(7%)

```
Query 4 GGLSGGGRGGAPGG 17
      GGL GGGGG GG
Sbjct 102 GGL-GGGRGGYGGG 114
```

Score = 24.1 bits (47), Expect = 0.19, Identities = 9/13(69%), Positives = 9/13(69%), Gaps = 0/13(0%)

```
Query 4 GGLSGGGRGGAPG 16
      GGL GGG GG G
Sbjct 29 GGLGGGGLGGGKG 41
```

**DBAASP\_2872|3112|Acanthoscurrin-1, Antibacterial, Antifungal, Antiparasitic activity, Length=132, Score = 26.2 bits (52), Expect = 0.026, Identities = 10/14(71%), Positives = 10/14(71%), Gaps = 0/14(0%)**

```
Query 4 GGLSGGGRGGAPGG 17
      GGL GGG GG GG
Sbjct 97 GGLGGGGLGGGRGG 110
```

Score = 25.0 bits (49), Expect = 0.097, Identities = 11/14(79%), Positives = 11/14(79%), Gaps = 1/14(7%)

```
Query 4 GGLSGGGRGGAPGG 17
      GGL GGGGG GG
Sbjct 102 GGL-GGGRGGYGGG 114
```

Score = 24.1 bits (47), Expect = 0.19, Identities = 9/13(69%), Positives = 9/13(69%), Gaps = 0/13(0%)

```
Query 4 GGLSGGGRGGAPG 16
      GGL GGG GG G
Sbjct 29 GGLGGGGLGGGKG 41
```

**APD\_453|AP01405| Leptoglycin, from *Leptodactylus pentadactylus* [Smokey jungle frog], Antibacterial activity against Gram<sup>-</sup> bacteria: *P. aeruginosa*, *E. coli*, and *C. freundii*, Length=22, Score = 21.5 bits(41), Expect = 0.41, Identities = 11/19(58%), Positives = 12/19(63%), Gaps = 3/19(16%)**

```
Query 2 LVGGLSG---GGRGGAPGG 17
      L+GGL G GG GG GG
Sbjct 2 LLGGLLGPLLGGGGGGGGG 20
```

### **Peptide No10 LGGLGGGGAGGGGLVGEPPG**

**DBAASP\_2873|3113|Acanthoscurrin-2, UniProt: Q8I6R7, Antibacterial (Gram<sup>-</sup>) and Antifungal activity,**

Length=130, Score = 34.0 bits (70), Expect = 1e-004, Identities = 14/18(78%), Positives = 14/18(78%), Gaps = 0/18(0%)

```
Query 2 GGLGGGGAGGGGLVGEPPG 19
      GGLGGGG GGGGL G G
Sbjct 24 GGLGGGGLGGGGLGGGKG 41
```

Score = 34.0 bits (70), Expect = 1e-004, Identities = 14/18(78%), Positives = 14/18(78%), Gaps = 0/18(0%)

```
Query 2 GGLGGGGAGGGGLVGEPPG 19
      GGLGGGG GGGGL G G
Sbjct 50 GGLGGGGLGGGGLGGGKG 67
```

Score = 33.1 bits (68), Expect = 2e-004, Identities = 13/15(87%), Positives = 13/15(87%), Gaps = 0/15(0%)

```
Query 2 GGLGGGGAGGGGLVG 16
      GGLGGGG GGGGL G
Sbjct 45 GGLGGGGLGGGGLGG 59
```

**DBAASP\_2872|3112|Acanthoscurrin-1, Antibacterial, Antifungal, and Antiparasitic activity, Length=132, Score = 34.0 bits (70), Expect = 1e-004, Identities = 14/18(78%), Positives = 14/18(78%), Gaps = 0/18(0%)**

```
Query 2 GGLGGGGAGGGGLVGEPPG 19
      GGLGGGG GGGGL G G
Sbjct 24 GGLGGGGLGGGGLGGGKG 41
```

Score = 34.0 bits (70), Expect = 1e-004, Identities = 14/18(78%), Positives = 14/18(78%), Gaps = 0/18(0%)

```
Query 2 GGLGGGGAGGGGLVGEPPG 19
      GGLGGGG GGGGL G G
Sbjct 50 GGLGGGGLGGGGLGGGKG 67
```

Score = 33.1 bits (68), Expect = 2e-004, Identities = 13/15(87%), Positives = 13/15 (87%), Gaps = 0/15(0%)

```
Query 2 GGLGGGGAGGGGLVG 16
      GGLGGGG GGGGL G
Sbjct 45 GGLGGGGLGGGGGLGG 59
```

**APD\_453|AP01405|Leptoglycin, from *Leptodactylus pentadactylus*, Antibacterial activity against Gram- bacteria: *P. aeruginosa*, *E. coli*, and *C. freundii***, Length=22, Score = 28.8 bits(58), Expect = 0.001, Identities = 13/20(65%), Positives = 14/20(70%), Gaps = 5/20(25%)

```
Query 1 LGGL-----GGGGAGGGGLV 15
      LGGL GGGG GGGGL+
Sbjct 3 LGLLGLPLLGGGGGGGGLL 22
```

**APD\_1670|AP00404|Holotricin 3, UniProt: Q25055, from *Holotrichia diomphalia* [Korean black chafer] Antibacterial and Antifungal activity**, Length=84, Score=29.3 bits(59), Expect=0.003, Identities=12/18(67%), Positives=13/18(72%),Gaps=3/18(17%)

```
Query 2 GGLGGGGAGGGGLVGEPE 19
      GG GGGG+GGG G PG
Sbjct 46 GGRGGGSGGG---GSPG 60
```

### Peptide No 11 NLVGGSGGGRRGGANPLG

**APD\_453|AP01405| Leptoglycin, from *Leptodactylus pentadactylus*, Antibacterial activity against Gram- bacteria: *P. aeruginosa*, *E. coli*, *C. freundii***, Length = 22, Score = 22.4 bits (43), Expect = 0.21, Identities = 8/11(73%), Positives = 9/11(82%), Gaps = 0/11(0%)

```
Query 2 LVGGSGGGRRG 12
      L+GG GGGG G
Sbjct 10 LLGGGGGGGGG 20
```

**APD\_1398|AP02256|Procambarin**, Length=155, Score = 28.4 bits(57), Expect = 0.008, Identities = 10/15(67%), Positives = 11/15(73%), Gaps = 0/15(0%)

```
Query 4 GSGGGGRRGGANPLG 18
      GG GGGG GG P+G
Sbjct 26 GGFGGGGLGGGKPIG 40
```

**CAMPSQ322|Holotricin-3, UniProt: Q25055, from *Holotrichia diomphalia* [Korean black chafer], Antibacterial and Antifungal activity**, Length=84, Score = 26.7 bits(53), Expect = 0.022, Identities = 9/10(90%), Positives = 9/10(90%), Gaps = 0/10(0%)

```
Query 4 GSGGGGRRGG 13
      GG GGGRRGG
Sbjct 41 GGHGGGRRGG 50
```

Score=24.1 bits(47), Expect=0.16, Identities=9/15(60%), Positives=9/15(60%), Gaps=0/15(0%)

```
Query 4 GSGGGGRRGGANPLG 18
      GG GGGG GG G
Sbjct 46 GGRGGGSGGGGSPG 60
```

### Peptide No 12 NGPNGGLGGSLVNGDPK

**glycine-rich cell wall structural protein 1.0 isoform X4 [*Ceratitis capitata*], Sequence ID: XP\_020714877.1, Length: 388, Number of Matches: 1, Score 31.6 bits(67), Identities 13/18(72%), Positives13/18(72%), Expect 0.018, Gaps1/18(5%)**

```
Query 1 NGPNGGLGGSLVNG-DPK 17
      NGPNGG G L NG DPK
Sbjct 294 NGPNGGNSGNLPGHDPK 311
```

### Peptide No 13 GLLGGGGAGGGGLVGLLNG

**DBAASP\_2873|3113|Acanthoscurrin-2, UniProt: Q8I6R7, from *Acanthoscurria gomesiana* [Tarantula spider], Antibacterial (Gram- bacteria) and Antifungal activity.**

Length=130, Score = 32.7 bits(67), Expect = 3e-004, Identities = 15/21(71%), Positives = 15/21(71%), Gaps = 0/21(0%)

```
Query 1 GLLGGGGAGGGGLVGLLNG 21
      G LGGG G GGGGL GG L G
Sbjct 34 GLLGGGKGLGGGGLGGGLGG 54
```

Score = 32.7 bits(67), Expect = 3e-004, Identities = 15/21(71%), Positives = 15/21(71%), Gaps = 0/21(0%)

```
Query 1 GLLGGGGGAGGGGLVGGLLNG 21
      G LGGG G GGGL GG L G
Sbjct 86 GGLGGGKGLGGGLGGGGLGG 106
```

Score = 31.0 bits(63), Expect = 0.001, Identities = 13/17(76%), Positives = 13/17(76%), Gaps = 0/17(0%)

```
Query 5 GGGGAGGGGLVGGLLNG 21
      GGGG GGGGL GG L G
Sbjct 43 GGGGLGGGGLGGGGLGG 59
```

**CAMPSQ3894 Leptoglycin, UniProt:P86267, from *Leptodactylus pentadactylus* [Smokey jungle frog], Antibacterial activity against Gram<sup>-</sup> bacteria: *P. aeruginosa*, *E. coli*, and *C. freundii*, Length=22, Score = 29.7 bits(60), Expect = 7e-004, Identities = 13/18(72%), Positives = 14/18 (78%), Gaps = 3/18(17%)**

```
Query 1 GLLG---GGGGAGGGGLV 15
      GLLG GGGG GGGGL+
Sbjct 5 GLLGPLLGGGGGGGGGLL 22
```

Score = 26.7 bits(53), Expect = 0.008, Identities = 15/25(60%), Positives = 15/25(60%), Gaps = 9/25(36%)

```
Query 1 GLLGG-----GGGAGGGGLVGGLL 19
      GLLGG GGG GGG GGLL
Sbjct 1 GLLGLLGPLLGGGGGGG---GGLL 22
```

### **Peptide No 14 MGLLGGVNGGKGGGGPGAP**

**APD\_453|AP01405| Leptoglycin, UniProt: P86267, from *Leptodactylus pentadactylus* [Smokey jungle frog], Antibacterial activity against Gram<sup>-</sup> bacteria: *P. aeruginosa*, *E. coli*, and *C. freundii*, Length = 22, Score = 30.6 bits (62), Expect = 4e-004, Identities = 12/17(71%), Positives = 14/17(82%), Gaps = 0/17(0%)**

```
Query 1 MGLLGGVNGGKGGGG 17
      +GLLG + GGG GGGG
Sbjct 3 LGLLGPLLGGGGGGGG 19
```

Score = 24.1 bits(47), Expect = 0.062, Identities = 11/16(69%), Positives = 12/16(75%), Gaps = 2/16(13%)

```
Query 1 MGLLGGVNGGKGGGG 16
      +G LLGG GGG GGG
Sbjct 7 LGPLLGG--GGGGGGG 20
```

Score = 23.7 bits(46), Expect = 0.088, Identities = 11/17(65%), Positives = 12/17(71%), Gaps = 0/17(0%)

```
Query 3 GLLGGVNGGKGGGGPG 19
      GLLGG+ G GGGG G
Sbjct 1 GLLGLLGPLLGGGGGG 17
```

**CAMPSQ3913|Ctenidin-1, UniProt:P86798, from *Cupiennius salei* [Wandering spider], Antimicrobial activity, Length=119, Score = 30.6 bits(62), Expect = 0.002, Identities = 13/18 (72%), Positives = 13/18(72%), Gaps = 0/18(0%)**

```
Query 2 GLLGGVNGGKGGGGPG 19
      GGL GG GGG GGGG G
Sbjct 90 GGLGGRRGGGGYGGGGGG 107
```

Score = 27.5 bits(55), Expect = 0.016, Identities = 12/18(67%), Positives = 12/18(67%), Gaps = 0/18(0%)

```
Query 2 GLLGGVNGGKGGGGPG 19
      GG GGV GG GGGG G
Sbjct 28 GYGGGVGGRRGGGGGLG 45
```

Score = 26.7 bits(53), Expect = 0.030, Identities = 11/16(69%), Positives = 12/16(75%), Gaps = 0/16 (0%)

```
Query 2 GLLGGVNGGKGGGG 17
      GG GG GGG+GGGG
Sbjct 65 GGGYGGGLGGGQGGGG 80
```

### **Peptide No 15 MLLNAKWAPHSTGPPNA**

**hypothetical protein AGLY\_005560 [*Aphis glycines*], Sequence ID: KAE9538461.1, Length: 188, Number of Matches: 1, Score 31.2 bits(66), Identities 9/12(75%), Positives 9/12(75%), Expect 0.025, Gaps0/12(0%)**

```
Query 6 KWAPHSTGPPNA 17
      KWAPH T PP A
Sbjct 79 KWAPHTTTTPPHA 90
```

**CAMPSQ7235 |Hymenoptaecin-1 isoform 2 precursor [*Nasonia vitripennis*], from *Nasonia vitripennis* [Jewel wasp], Antimicrobial activity, Length= 161, Score = 21.9 bits (42), Expect = 0.97, Identities = 6/8(75%), Positives = 6/8(75%), Gaps = 0/8(0%)**

Query 7 WAPHSTGP 14  
W P STGP  
Sbjct 40 WPPRSTGP 47

**CAMPSQ2692 |Hymenoptaecin-1 isoform 1 precursor *Nasonia vitripennis* [Parasitic wasp], Antimicrobial activity**, Length=208, Score = 21.9 bits(42), Expect = 1.0, Identities = 6/8 (75%), Positives = 6/8(75%), Gaps = 0/8(0%)

Query 7 WAPHSTGP 14  
W P STGP  
Sbjct 39 WPPRSTGP 46

Score = 21.9 bits(42), Expect = 1.0, Identities = 6/8(75%), Positives = 6/8(75%), Gaps = 0/8 (0%)

Query 7 WAPHSTGP 14  
W P STGP  
Sbjct 87 WPPRSTGP 94

**Peptide No 16 LPFLGLVGGLLGGSVGGGGGGGPAL**

**CAMPSQ3894|Leptoglycin, UniProt: P86267, from *Leptodactylus pentadactylus* [Smokey jungle frog], Antimicrobial activity against Gram<sup>-</sup> bacteria**, Length=22, Score = 38.3 bits(80), Expect = 9e-007, Identities = 15/19(79%), Positives = 17/19(89%), Gaps = 0/19(0%)

Query 5 GLVGGLLGGSVGGGGGGGG 23  
GL+GGLLG +GGGGGGGG  
Sbjct 1 GLLGGLLGPLLGGGGGGGG 19

Score = 31.4 bits(64), Expect = 2e-004, Identities = 14/18(78%), Positives = 15/18(83%), Gaps = 2/18(11%)

Query 5 GLVGGLLGGSVGGGGGGGG 22  
GL+G LLGG GGGGGGG  
Sbjct 5 GLLGPLLGG--GGGGGGG 20

**CAMPSQ3913 |Ctenidin-1, UniProt: P86798, from *Cupiennius salei* [Wandering spider], Antimicrobial activity**, Length=119, Score = 31.9 bits(65), Expect = 7e-004, Identities = 13/20(65%), Positives = 15/20(75%), Gaps = 0/20(0%)

Query 4 LGLVGGLLGGSVGGGGGGGG 23  
+GL GG GG +GGG GGGG  
Sbjct 61 VGLGGGGYGGGLGGGQGGGG 80

Score = 29.7 bits(60), Expect = 0.004, Identities = 12/16(75%), Positives = 12/16(75%), Gaps = 0/16(0%)

Query 8 GLLGGSVGGGGGGGG 23  
GG GG VGGG GGGG  
Sbjct 27 GGGYGGGVGGGRGGGG 42

Score = 28.8 bits(58), Expect = 0.007, Identities = 12/16(75%), Positives = 12/16(75%), Gaps = 0/16(0%)

Query 8 GLLGGSVGGGGGGGG 23  
GG LGG GGGG GGG  
Sbjct 89 GGGGLGGGRGGGGYGGG 104

**Peptide No17 DVESLPVGGLGGGGGAGGGGLVGGNLGGGAG**

**DBAASP\_2873|3113|Acanthoscurrin-2, Strong activity against the Gram<sup>-</sup> bacterium *E.coli* and yeast *C. albicans***, Length=130, Score = 44.8 bits(95), Expect = 4e-008, Identities = 19/26(73%), Positives = 20/26(77%), Gaps = 0/26(0%)

Query 7 VGGGGGGGAGGGGLVGGNLGGGAG 32  
+GG G GGGG GGGGL GG LGGG G  
Sbjct 42 LGGGGLGGGGLGGGGLGGGGLGGGK 67

Score = 44.4 bits(94), Expect = 5e-008, Identities = 19/25(76%), Positives = 19/25(76%), Gaps = 0/25(0%)

Query 8 GGGGGGGGAGGGGLVGGNLGGGAG 32  
GG GG GGG GGGGL GG LGGG G  
Sbjct 17 GGGGGYGGGLGGGGLGGGGLGGGK 41

Score = 43.9 bits(93), Expect = 7e-008, Identities = 20/27(74%), Positives = 20/27(74%), Gaps = 4/27(15%)

Query 8 GGLGGG----GGGAGGGGLVGGNLGGG 30  
GGLGGG GGG GGGGL GG LGGG  
Sbjct 34 GGLGGGKGLGGGGLGGGGLGGGGLGGG 60

**CAMPSQ3913|Ctenidin-1, UniProt: P86798, from *Cupiennius salei* [Wandering spider], Antimicrobial activity**, Length=119, Score = 38.9 bits(89), Expect = 8e-007, Identities = 18/26(69%), Positives = 19/26(73%), Gaps = 1/26(4%)

Query 8 GGLGGG-GGGAGGGGLVGGNLGGGAG 32  
GG GGG GGG GGGG +GG GGG G  
Sbjct 28 GGYGGGVGGGRGGGGGLGGGRGGGGG 53

Score = 38.5 bits(88), Expect = 1e-006, Identities = 18/25(72%), Positives = 18/25(72%), Gaps = 2/25(8%)

```
Query 8 GGLGGGGGGAGGGGLVGGNLGGGAG 32
      GG GGGGGG GGG VGG GGG G
Sbjct 21 GGYGGGGGGYGGG--VGGGRGGGGG 43
```

Score = 37.7 bits (86), Expect = 2e-006, Identities = 16/23(70%), Positives = 16/23(70%), Gaps = 0/23(0%)

```
Query 8 GGLGGGGGGAGGGGLVGGNLGGG 30
      GG GGGG G GGGG GG GGG
Sbjct 94 GGRGGGGYGGGGGGYGGGKYGGG 116
```

#### **APD\_453|AP01405|Leptoglycin, antibacterial activity against Gram<sup>-</sup> bacteria**

Length=22, Score = 29.3 bits(59), Expect = 0.002, Identities = 13/20(65%), Positives = 15/20(75%), Gaps = 3/20(15%)

```
Query 7 VGLLGG---GGGGAGGGGLV 23
      +GGL G GGGG GGGGL+
Sbjct 3 LGLLGLPLLGGGGGGGGLL 22
```

Score = 22.8 bits(44), Expect = 0.39, Identities = 9/13(69%), Positives = 10/13(77%), Gaps = 0/13(0%)

```
Query 20 GGLVGGNLGGGAG 32
      GGL+G LGGG G
Sbjct 4 GLLGLPLLGGGGG 16
```

Score = 22.4 bits (43), Expect = 0.57, Identities = 8/11(73%), Positives = 9/11(82%), Gaps = 0/11(0%)

```
Query 6 PVGGLGGGGGG 16
      P+ G GGGGGG
Sbjct 9 PLLGGGGGGGG 19
```

#### **CAMPSQ3973|Glycine-rich protein GWK, Cucumis melo [Muskmelon], Antifungal activity**

Length=36, Score = 38.3 bits (80), Expect = 1e-006, Identities = 17/25 (68%), Positives = 17/25(68%), Gaps = 0/25(0%)

```
Query 8 GGLGGGGGGAGGGGLVGGNLGGGAG 32
      GG GGGGG GGGG GG GGG G
Sbjct 6 GGWGGGGGWKGGGGGGGWKGGGGG 30
```

Score = 31.9 bits(65), Expect = 2e-004, Identities = 15/22(68%), Positives = 15/22(68%), Gaps = 2/22(9%)

```
Query 9 GLGGGGGGAGGGGLVGGNLGGG 30
      G GGGGGG GGG GG GGG
Sbjct 16 GGGGGGGGWKGGG--GGGKGGG 35
```

#### **APD\_2350|AP02350|Microcin B, Antimicrobial activity**

Length=42, Score = 36.6 bits(76), Expect = 6e-006, Identities = 17/24(71%), Positives = 18/24 (75%), Gaps = 2/24 (8%)

```
Query 9 GLGGGGGGAGGGGLVGGNLGGGAG 32
      G+GGGGGG GGGG GG GGG G
Sbjct 2 GIGGGGGG-GGGGSCGGQ-GGGCG 23
```

Score = 31.4 bits(64), Expect = 4e-004, Identities = 19/38(50%), Positives = 21/38 (55%), Gaps = 12/38(32%)

```
Query 7 VGGLGGGGGGA-----GGG-----GLVGGNLG-GGAG 32
      +GG GGGGGG GGG G GGN G GG+G
Sbjct 3 IGGGGGGGGGSCGGQGGGCGGCSNGCSGGNNGSGSG 40
```

Score = 29.6 bits(65), Expect = 0.001, Identities = 14/23(61%), Positives = 15/23(65%), Gaps = 1/23(4%)

```
Query 7 VGLGGGGGGAGGGGLVGGNLGG 29
      +GG GGGGGG G G GG GG
Sbjct 3 IGG-GGGGGGGGSCGGQGGGCGG 24
```



## Supplementary Information No2

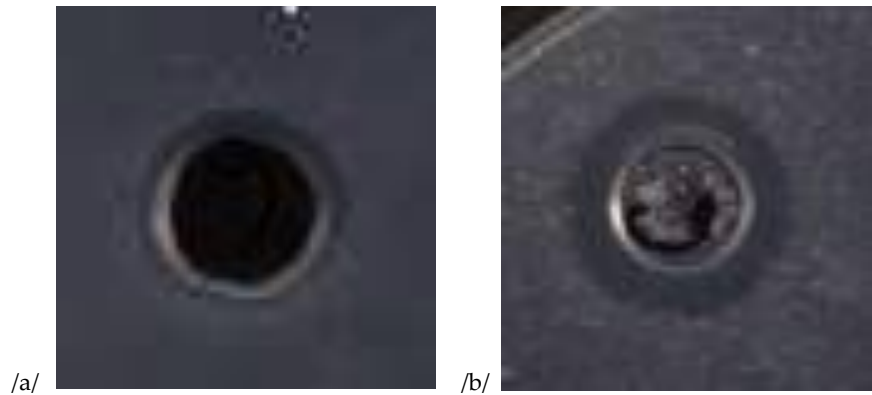

**SI2, Figure s1.** Illustrations of sterile areas in investigation of antibacterial activity against model bacteria antibacterial effect of Sample 4 against *Pseudomonas aureofaciens* AP9 at deep aerobic cultivation /a/ - control; /b/ sterile zone for sample 4;

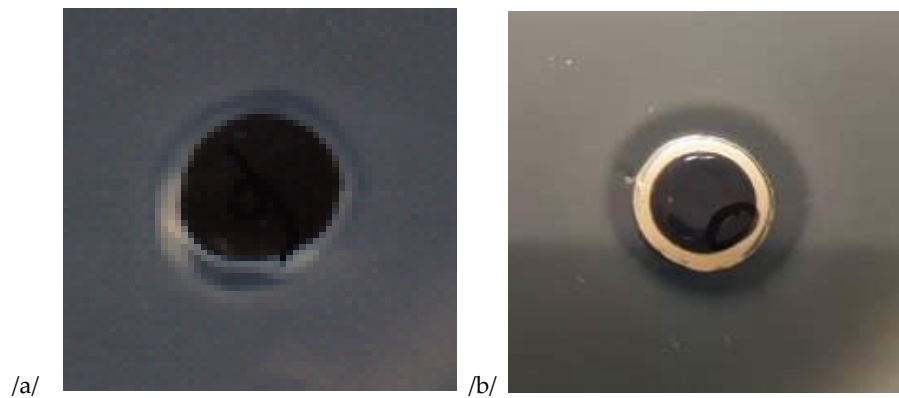

**SI2, Figure s2.** Illustrations of sterile areas in investigation of antibacterial activity against model bacteria antibacterial effect of Sample 4 against *Brevibacillus laterosporus* BT-271 at deep aerobic cultivation /a/ - control; /b/ sterile zone for sample 4;
